# Supplementary material for: Wavelet Analysis of Elastic Wave for Wall Thinned High-Pressure Service Pipes
Source: Oxford University Press journal article supplement (doi:10.1242/jeb.156935), 2005-01-01
Supplement: jeb156935supp.pdf [file jeb156935supp.pdf]

**Table S1. Primers designed for sequencing of cytosolic malate dehydrogenase (cMDH)**

**cDNAs**

| Primer ID | Description   | Sequences (5'–3')      |
|-----------|---------------|------------------------|
| GSP-Ma-1  | 3'-RACE       | CAGCGACCAGCCAATCAT     |
| GSP-Ma-2  | 3'-RACE       | ATCCCTACCTGTGACGAGAAA  |
| MaRa-F1   | 5'-ORF primer | CGTCAACCCATCTTCTGCT    |
| MaRa-F2   | 5'-ORF primer | GCAGCGACCAGCCAATC      |
| MaRa-R1   | 3'-ORF primer | CTTTATGCGTATGACACCGTTA |
| MaRa-R2   | 3'-ORF primer | CAAACCCACGCAACTGTCTA   |

**Table S2. The accuracies of the molecular modeling for *EmcMDH* and *ErcMDH* and the template structure 5MDH-A**

| Program  | Overall quality factor (%) |               |        |
|----------|----------------------------|---------------|--------|
|          | <i>EmcMDH</i>              | <i>ErcMDH</i> | 5MDH-A |
| PROCHECK | 99.7                       | 99.7          | 99.3   |
| Verify3D | 90.9                       | 90.0          | 88.3   |
| ERRAT    | 81.7                       | 81.7          | 92.9   |

PROCHECK: the percent of residues in most favored regions, additional allowed regions and generously allowed regions; Verify3D: pass, at least 80% of the amino acids have scored  $\geq 0.2$  in the 3D/1D profile; ERRAT: for low resolutions (2.5 to 3 Å), the average overall quality factor is around 91%.

*EmcMDH*, the cytosolic malate dehydrogenase from *Echinolittorina malaccana*; *ErcMDH*, the cMDH from *E. radiata*; 5MDH-A, a template structure file in PDB format of porcine (*Sus scrofa*) cMDH (Chain-A).

**Fig. S1. Native-polyacrylamide gel electrophoresis (PAGE) of two isoforms of malate dehydrogenase (MDH) from *Echinolittorina malaccana* (A) and *E. radiata* (B).**

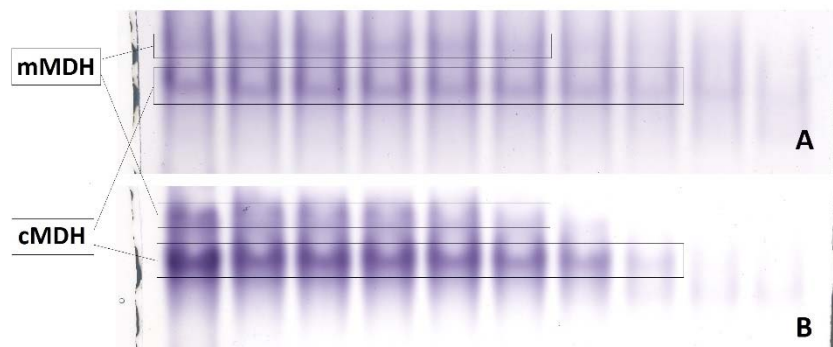

cMDH, cytosolic isoform of MDH; mMDH, mitochondrial isoform of MDH.

**Fig. S2. Nucleotide sequence alignments of the 999bp coding regions of *cmdh* (cytosolic malate dehydrogenase) cDNAs from *Echinolittorina malaccana* and *E. radiata*.**

|                     |                                                                                                         |     |
|---------------------|---------------------------------------------------------------------------------------------------------|-----|
| <i>E. malaccana</i> | ATGAGTGAACCAGTGAAAAGTATGCGTAACTGGTGTGCTGGCCAGATTGCTTACTCCCTGCTGTACTCCATCGCCAAGGGAGATGTCTTTGGCAGCGACCAG  | 102 |
| <i>E. radiata</i>   | -----t-----c-----a-----                                                                                 | 102 |
| <i>E. malaccana</i> | CCAATCATCCTGACCCCTGCTGGACATTGCCCCATGGAGGGTGTCTCAATGGAGTGGTCATGGAGCTCATGGACTGTGCCATGCCCTCCTCAAAGAGGTG    | 204 |
| <i>E. radiata</i>   | -----t-----a-----g----c--c-----                                                                         | 204 |
| <i>E. malaccana</i> | ATCCCTACCTGTGACGAGAAAGTGGCCTTCAAGGATATTGATGCGGCCTTCTGGTGGGCGCCATGCCGCGTCGTGAGGGCATGGAGCGCAAGGACCTGCTG   | 306 |
| <i>E. radiata</i>   | -----c-----a-----a-----t-----                                                                           | 306 |
| <i>E. malaccana</i> | GCAGCCAACATCAAGATCTTCAAGTCCCAGGGCGGGCGCCCTTGACACTGTGGCCAAGAAGACCGTCAAGGTGGTTGTGGTGGGCAACCCTGCCAACACCAAC | 408 |
| <i>E. radiata</i>   | -----tct--t-----c--t-----a-----t-----                                                                   | 408 |
| <i>E. malaccana</i> | GCTCTGATCTGCAGCAAGTACGCCCTTCCATTCTAAGGAGAACTTCTCCTGTCTCACCAGACTGGACCAGAACCGTGCCCAGGCACAGATTGCGGCTCGC    | 510 |
| <i>E. radiata</i>   | -----a-----t-----t-----a-----a-----a---                                                                 | 510 |
| <i>E. malaccana</i> | TTGGGCATTCCCAACAGTGTCTGTTAGTAACGTCATCATCTGGGGCAATCACTCATCCACACAGTTCCTGACGTTTCGTACGCCAAGGCCATCGTCAACGGC  | 612 |
| <i>E. radiata</i>   | ----t----t-----c-----a-----g--a----c--t-----t-----t-----                                                | 612 |
| <i>E. malaccana</i> | AAAAACAGTGCCTGTCCCTGAGGCTGTCAAGGATGACAACACTTGAAGAATGAATTTTGGACAACAGTGCAGAAGCGTGGTGGGGAAGTGATCAAGGCCCGT  | 714 |
| <i>E. radiata</i>   | -----c--a-----g-----t-----                                                                              | 714 |
| <i>E. malaccana</i> | AAGCTGTCCAGTGCAATGTCAGCTGCCAAGGCTACAGCCGATCACATGCGTGACTGGTGGTTTGGAACTCAGGGGACAACCTGGGTGTCCATGGGCGTGTTT  | 816 |
| <i>E. radiata</i>   | -----c-----c-----t-----                                                                                 | 816 |
| <i>E. malaccana</i> | TCCACGGGAGCCTACGGCATCCCAGAAGGATCATGTACAGTACCCAGTGCGCATTGCCAACAAACAGTGAAGATCGTGGAGGGACTGGAGATCAACGAT     | 918 |
| <i>E. radiata</i>   | -----t-----                                                                                             | 918 |
| <i>E. malaccana</i> | TTTGCTCGTGAGAAGATGGACCTGACGGCCAAAGAGCTGTGTGAGGAGAGGCCATGGCTGAAGAAATCTGCAACCAGTGA                        | 999 |
| <i>E. radiata</i>   | -----c-----c-----g-----c-----                                                                           | 999 |
